# Supplementary material
Source: MDPI journal article supplement (https://www.mdpi.com/2297-8739/10/2/108)
Supplement: s1 [file s1 › separations-2127611-supplementary.pdf]

## Supplementary Material

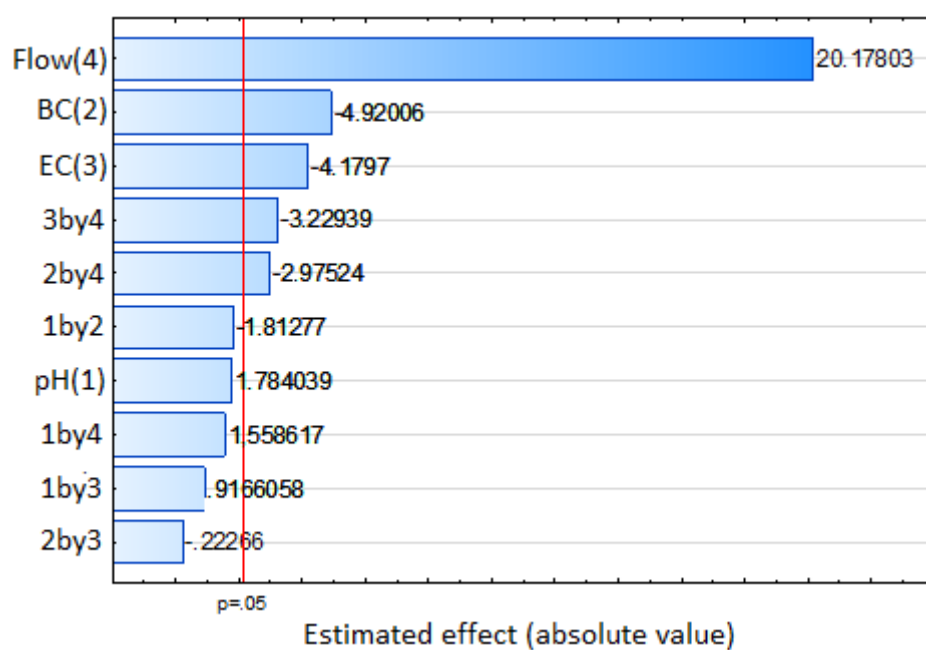

Figure S1. Pareto chart obtained from the  $2^4$  factorial design of Cu (II) when analyzed by the ratio absorbance/time of analysis. 95% confidence level.

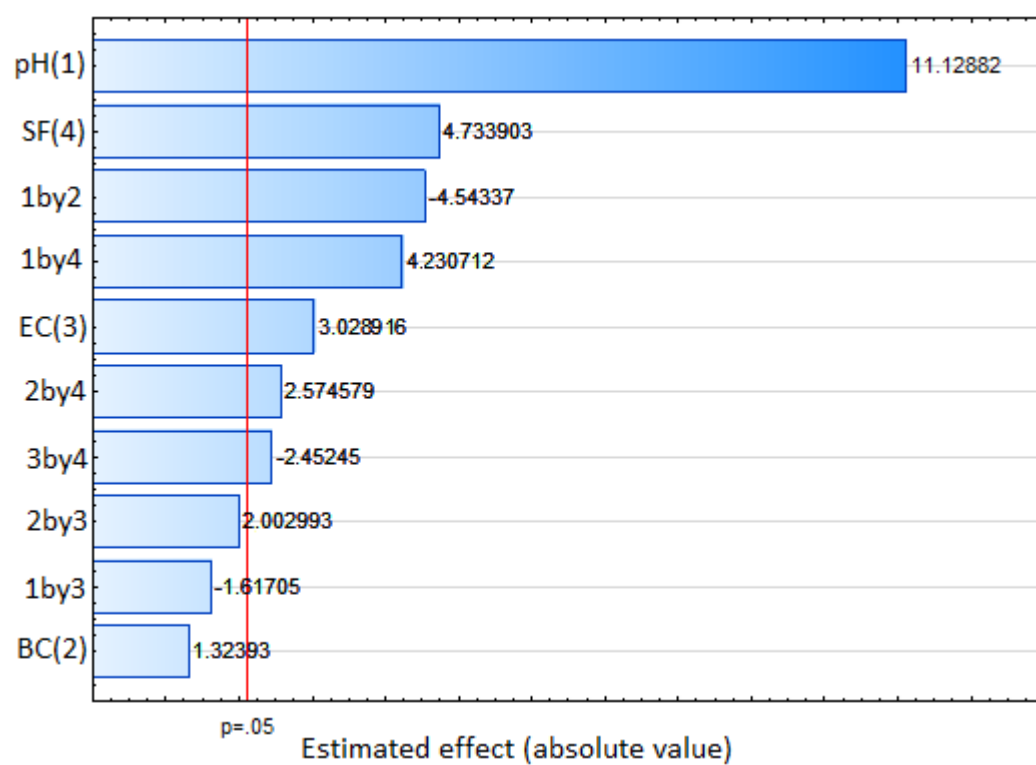

Figure S2. Pareto chart obtained from the  $2^4$  factorial design of Cd (II) when analyzed by the ratio absorbance/time of analysis. 95% confidence level.
